# Supplementary material for: Construction and analysis of cardiac hypertrophy-associated lncRNA-mRNA network based on competitive endogenous RNA reveal functional lncRNAs in cardiac hypertrophy
Source: PubMed Central journal article supplement (PMC4905442; doi:10.18632/oncotarget.7312), 2016-02-10
Supplement: oncotarget-07-10827-s001.pdf [file oncotarget-07-10827-s001.pdf]

## **Construction and analysis of cardiac hypertrophy-associated lncRNA-mRNA network based on competitive endogenous RNA reveal functional lncRNAs in cardiac hypertrophy**

### **Supplementary materials**

Table S1: The result of gene ontology analysis of SLC26A4-AS1. We used its mRNA neighbors in CHLMN and we thought p-value  $< 0.01$  was statistical significant.

Table S2: The result of KEGG pathway analysis of SLC26A4-AS1. We used its mRNA neighbors in CHLMN and we thought p-value  $< 0.05$  was statistical significant.

Table S3: The result of gene ontology analysis of RP11-344E13.3. We used its mRNA neighbors in CHLMN and we thought p-value  $< 0.01$  was statistical significant.

Table S4: The result of KEGG pathway analysis of RP11-344E13.3. We used its mRNA neighbors in CHLMN and we thought p-value  $< 0.05$  was statistical significant.

Table S5: The result of gene ontology analysis of MAGI1-IT1. We used its mRNA neighbors in CHLMN and we thought p-value  $< 0.01$  was statistical significant.

Table S6: The result of KEGG pathway analysis of MAGI1-IT1. We used its mRNA neighbors in CHLMN and we thought p-value  $< 0.05$  was statistical significant.

Table S7: The result of gene ontology analysis of module 2. We used the lncRNAs' mRNA neighbors in CHLMN and we thought  $p\text{-value} < 0.05$  was statistical significant.

Table S8: The result of subpathway analysis of module 2. We used the lncRNAs' mRNA neighbors in CHLMN and we thought  $p\text{-value} < 0.01$  was statistical significant.

Table S9: The result of random walk of CHLMN. We selected 5 seeds (disease genes) to perform random walk and identified 2 lncRNAs high related to CH.

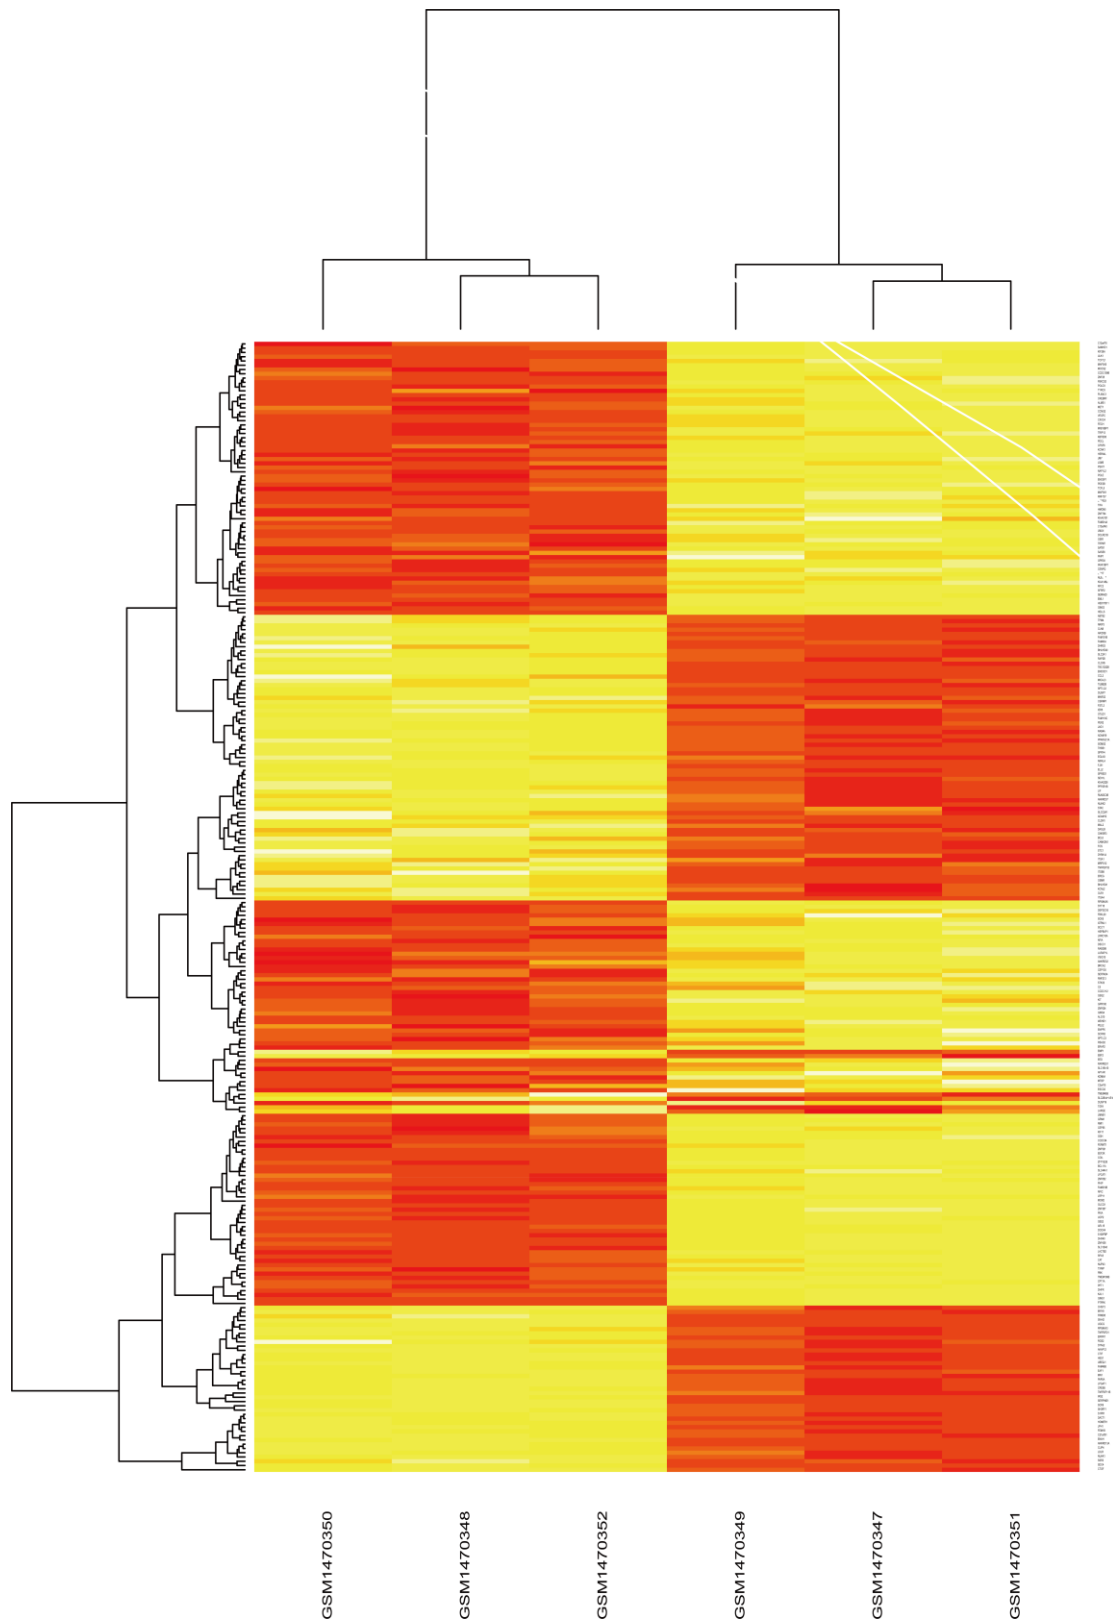

Figure S1: The heatmap of lncRNA SLC26A4-AS1 and their mRNA neighbors based on expression data. The columns represented 6 samples and the rows represented lncRNA and its mRNA neighbors.

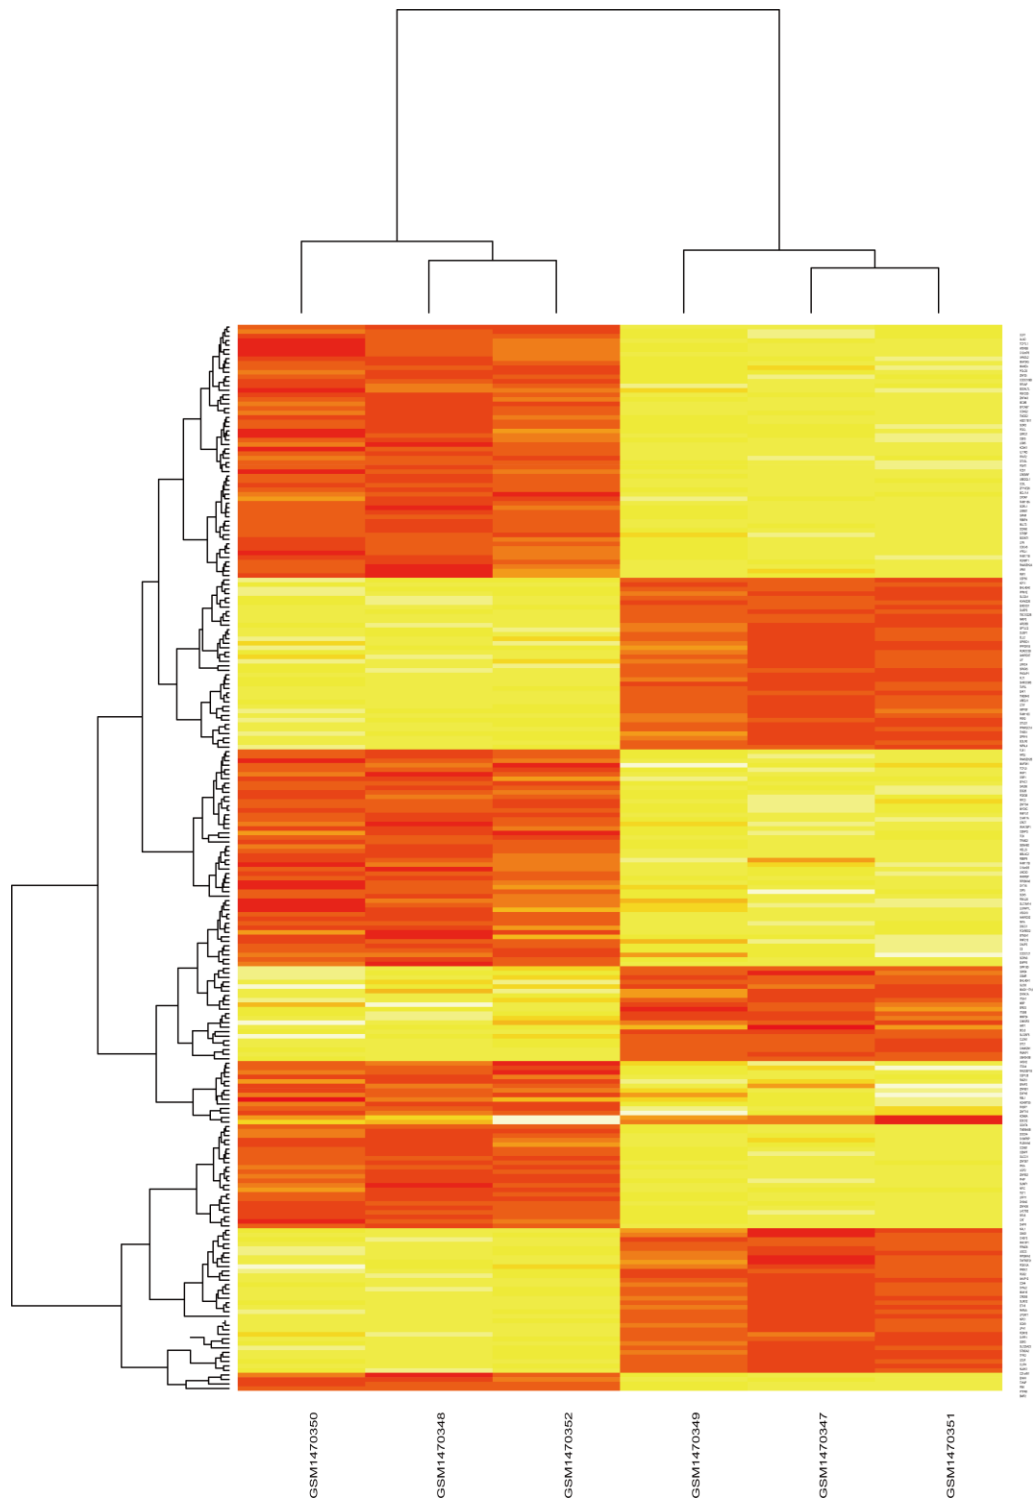

Figure S2: The heatmap of lncRNA MAGI1-IT1 and their mRNA neighbors based on their expression. The columns represented 6 samples and the rows represented of lncRNA and its mRNA neighbors.



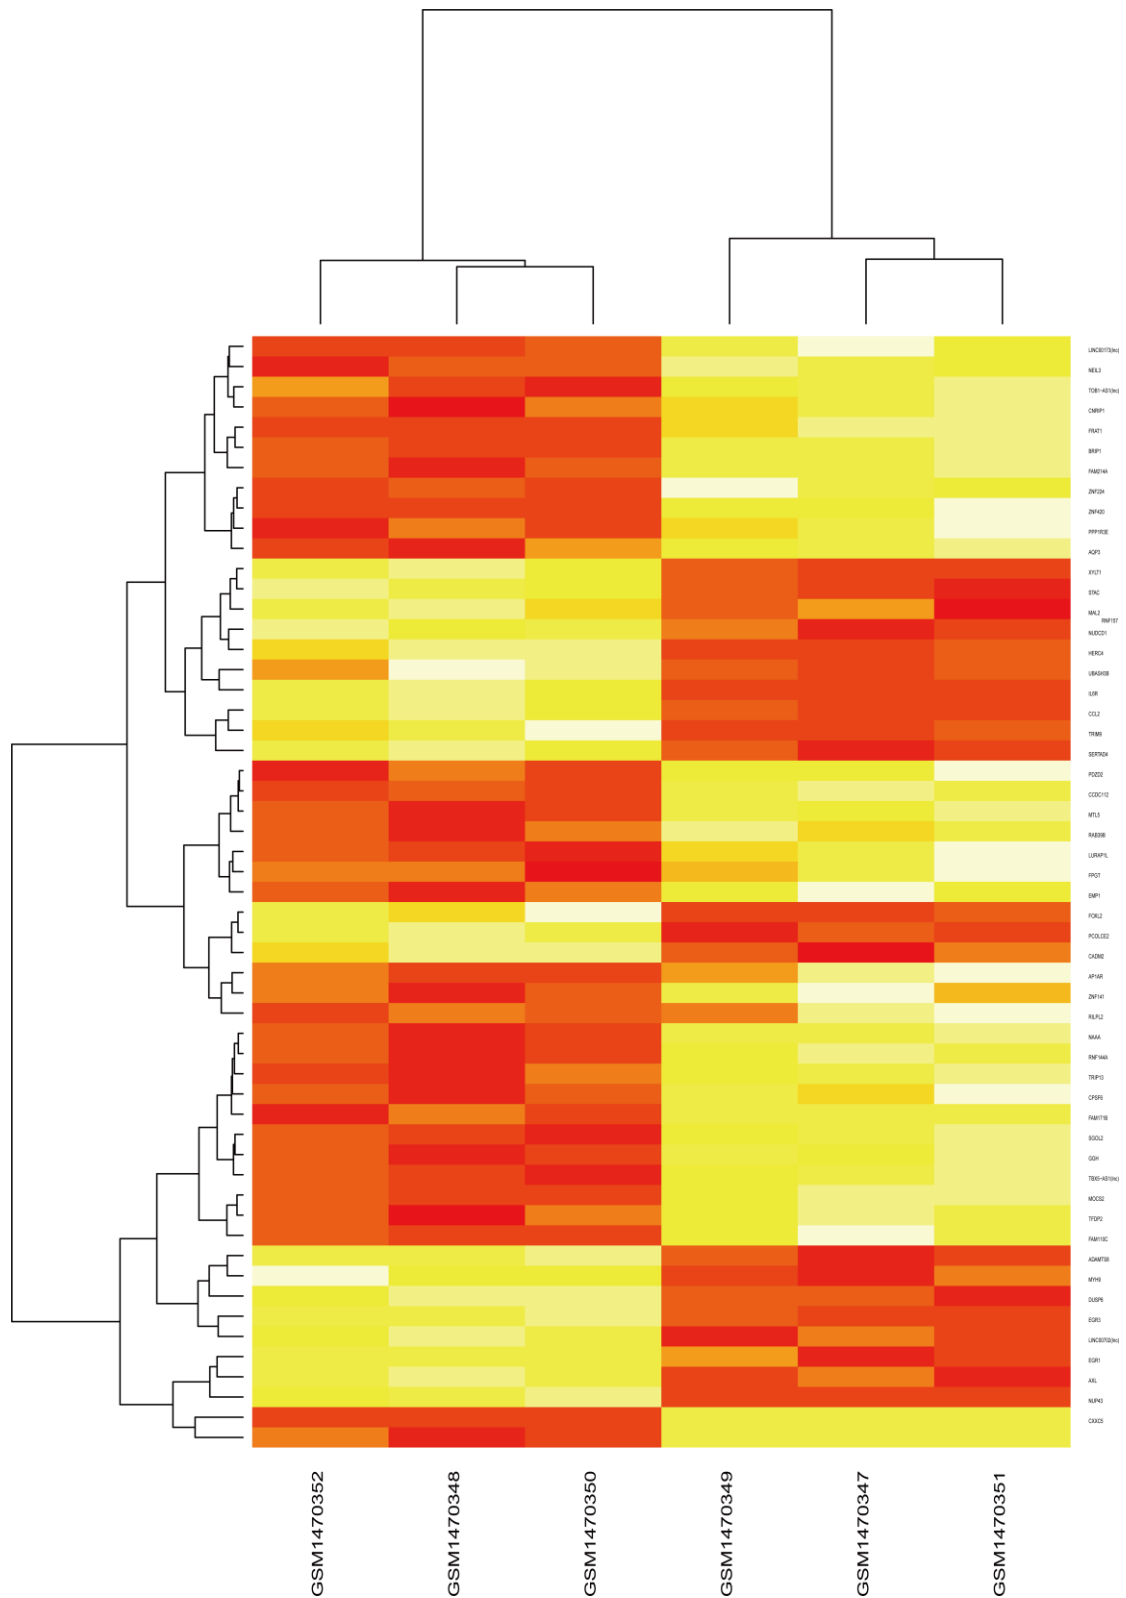

Figure S4: The heatmap of lncRNAs appeared in module 2 and their mRNA neighbors based on their expression. The columns represented 6 samples and the rows represented lncRNAs and their mRNA neighbors.
